1           **Green tea infusion aggravates nutritional status of the juvenile**  
2                   **untreated STZ-induced type 1 diabetic rat**

3  
4                   Short title: Tea worsen diabetic rats' health

5  
6   Luiz Carlos Maia Ladeira<sup>a\*</sup>, Eliziária Cardoso dos Santos<sup>b,c</sup>, Bruno Ferreira Mendes<sup>d</sup>,  
7   Eliana Alviarez Gutierrez<sup>e</sup>, Cynthia Fernandes Ferreira Santos<sup>b</sup>, Fernanda Batista de  
8   Souza<sup>c</sup>, Mariana Machado-Neves<sup>a</sup>, Izabel Regina dos Santos Costa Maldonado<sup>a</sup>

9  
10   <sup>a</sup> Departamento de Biologia Geral, Universidade Federal de Viçosa, Viçosa, Minas  
11   Gerais, Brasil.

12   <sup>b</sup> Escola de Medicina da Universidade Federal do Vale do Jequitinhonha e Mucuri,  
13   Diamantina, Minas Gerais, Brasil.

14   <sup>c</sup> Programa de Pós-Graduação em Reabilitação e Desempenho Funcional da Universidade  
15   Federal do Vale do Jequitinhonha e Mucuri, Diamantina, Minas Gerais, Brasil.

16   <sup>d</sup> Programa Multicêntrico de Pós-Graduação em Ciências Fisiológicas, Sociedade  
17   Brasileira de Fisiologia, São Paulo, Brasil.

18   <sup>e</sup> Departamento de Tecnologia de Alimentos, Universidade Federal de Viçosa, Minas  
19   Gerais, Brasil.

20  
21  
22  
23  
24  
25  
26  
27  
28  
29  
30  
31  
32  
33  
34  
35  
36   \*Corresponding author: Departamento de Biologia Geral, Universidade Federal de  
37   Viçosa. Av. P.H. Rolfs, s/n, Campus Universitário, Viçosa 36570-900, Minas Gerais,  
38   Brasil. E-mail address: [luizmaialadeira@gmail.com](mailto:luizmaialadeira@gmail.com) (Ladeira, L. C. M.).

1 **Summary**

2

3 We have described for the first time the potential harmful effects of green tea on the  
4 metabolism and body composition of untreated juvenile experimental type 1 diabetic rats.  
5 The treatment containing 19.38% of epigallocatechin-3-gallate, its main catechin,  
6 increased blood glucose and water intake. It also increased oxygen consumption,  
7 enhanced energy expenditure and led to a lipid oxidation tendency in diabetic animals,  
8 which worsened the development of body fat in a way significantly more aggravated than  
9 diabetes alone. Taken together, our findings indicate that green tea treatment, when  
10 provided to juvenile diabetics, increases glycaemia, changes the body composition by  
11 reducing fat content and increases oxygen consumption, besides affecting energy  
12 expenditure. Therefore, the nutritional status of the juvenile type 1 diabetic rat is  
13 aggravated.

14

15 **Keywords:** Type 1 diabetes, green tea, body composition, energy expenditure, nutritional  
16 status

17

18

19

20

21

22

23

24

25

26

27

28

29

## 1 **1. Introduction**

2           Diabetes mellitus (DM) is a serious heterogeneous metabolic disease with  
3    increasing rates of incidence and prevalence worldwide <sup>1,2</sup>. It is estimated that about 415  
4    million adults have DM, and in 2040 figures are expected to reach 642 million <sup>3</sup>. The  
5    disease-related complications, especially in type 1 DM (i.e. insufficient production of  
6    insulin by the pancreatic beta cells) include micro and macrovascular disturbances <sup>4</sup>,  
7    hepatic damage <sup>5</sup>, renal <sup>6</sup>, cardiac <sup>7</sup>, and neurological impairment <sup>8</sup>, aside from the poor  
8    nutritional status characterized by diabetes. Taken together, these complications become  
9    an important cause of morbidity and mortality, with negative impact on life quality,  
10   consequently reducing the life expectancy of these individuals <sup>1,3</sup>.

11           Insulin therapy is effective and safe for the treatment of type 1 DM <sup>9</sup>, but it alone  
12   does not eliminate the risk of complications from the disease. Therefore, non-  
13   pharmacological strategies, such as physical exercises and use of natural compounds with  
14   antioxidant polyphenols have been described as a complementary treatment <sup>10-14</sup>. Within  
15   this category of compounds, studies have focused on the effect of epigallocatechin-3-  
16   gallate (EGCG), a catechin present in large amounts in green tea <sup>14-16</sup>. Due to its potential  
17   therapeutic effect and pharmacological action (e.g. antioxidant, antidiabetic, anti-  
18   inflammatory and anti-apoptotic properties) described in previous studies <sup>15,17-20</sup>, EGCG  
19   has been considered as a possible adjuvant in the treatment of diabetes, so as to improve  
20   the general health of individuals and, consequently, delay the development of DM  
21   complications <sup>13,14,21</sup>. It has been suggested that this adjuvant profile is closely correlated  
22   with the inhibition of glucose production in hepatocytes <sup>22</sup>. In fact, studies showed that  
23   green tea catequins suppressed hepatic gluconeogenic activity and activated the 5'-AMP-  
24   activated protein kinase (AMPK), which improved insulin signaling pathway and  
25   downregulated the genes that encode gluconeogenic enzymes <sup>22-24</sup>.

1           Due to the antidiabetic activity described for EGCG and its antioxidant  
2           proprieties, various studies have explored the use of tea catechins, isolated or in  
3           combination with other drinks with similar proprieties, as an alternative to evaluate its  
4           systemic effect on different pathophysiological processes<sup>15,25</sup>. Despite its relevant effects  
5           in most cases, one should consider the thermogenic potential of this kind of substance  
6           <sup>26,27</sup>. It is well known that green tea polyphenolic compounds also modulate energy  
7           metabolism, thus enhancing thermogenesis, fat oxidation and energy expenditure<sup>27-30</sup>.  
8           Therefore, caution should be taken, especially regarding the use of these substances to  
9           treat some diseases, since this type of response can be potentially noxious and aggravate  
10          an already installed pathological process.

11          In type 1 DM, some of the green tea metabolic effects can be harmful to a certain  
12          extent<sup>31-33</sup>. Studies with experimental diabetes in rats showed that untreated diabetic  
13          animals present an impaired nutritional status and, especially when the disease appears in  
14          preadolescent rats or at younger ages, this condition can be aggravated and irreversible  
15          <sup>34,35</sup>. Thus, the present study aimed to investigate the effects of green tea infusion on the  
16          nutritional status of type 1 diabetic rats, considering their feeding and murinometric  
17          parameters, body composition and metabolism of their untreated experimental model of  
18          type 1 diabetic rat.

19

## 20   **2. Materials and methods**

### 21   *2.1. Animals and ethics statement*

22          Eighteen male Wistar rats (30 days old;  $82.52 \pm 10.83$ g) were provided by the  
23          Central Animal Laboratory of the Center of Biosciences and Health from the Federal  
24          University of Viçosa. The animals were housed in polypropylene cages, in pairs, under  
25          controlled conditions of temperature ( $22 \pm 2$  °C) and light-dark cycles (12/12h). All

1 animals received food (Presence Alimentos, Paulínea, SP, Brazil) and water *ad libitum*.  
2 The use of animals in the research was approved by the Ethics Committee of Animal Use  
3 of the Federal University of Viçosa (CEUA/UFV – protocol number 53/2018).

4

## 5 *2.2. Preparation of green tea infusion*

6 Five different lots of green tea (*Camellia sinensis*) leaves were obtained from  
7 Leão<sup>®</sup> - Food and Beverages (Coca-Cola Company<sup>®</sup>). The lots were mixed (1:1) and the  
8 infusion was prepared mixing the leaves with warm distilled water (1:40 w/v, 80 °C)<sup>36</sup>.  
9 The mixture remained infused for 20 minutes on a magnetic stirrer. Then, it was filtered  
10 through a 0.45 µm porous filter, frozen at -80 °C and lyophilized. The lyophilized samples  
11 were resuspended in distilled water at the moment of use.

12

## 13 *2.3. Determination of total phenolic content*

14 Total phenolic content was determined in triplicates as described before by  
15 Singleton and Rossi<sup>37</sup> using the Folin-Ciocalteu reagent. To that porpoise, an aliquot of  
16 0.6 mL of the lyophilized extract resuspended in distilled water (1:25 w/v) was added to  
17 3 mL of the Folin-Ciocalteu reagent. After 6 minutes, 2.4 mL of 7.5% sodium carbonate  
18 solution was added and agitated. The tubes were allowed to stand in dark for 1 hour at  
19 room temperature. The absorbance was measured at 760nm using an ultraviolet (UV)-  
20 spectrophotometer (BEL UV-M51, BEL Photonics, Italy). Different concentrations of  
21 gallic acid dissolved in distilled water were used to prepare the calibration curve ( $r^2 =$   
22 0.9992). The total phenolic content was expressed as milligrams of gallic acid equivalent  
23 per gram of lyophilized samples of tea (mg GAE/g GTI).

24

## 25 *2.4. EGCG analysis*

1 EGCG analysis was performed as described by Kim-Park et al.<sup>38</sup>, with some  
2 modifications. High-performance liquid chromatography (HPLC) (Prominence LC-20A,  
3 Shimadzu, Kyoto, Japan), equipped with Diode Arrangement Detector (DAD), LC-20AD  
4 pump, SPD-M20A detector, CTO-20A oven and LabSolutions software, was used to  
5 determine the EGCG content using a maximal absorption peaks at 272nm. It was used a  
6 Vydac C18 (4.6 x 250 mm) column, at 30 °C, with a 5µL injection volume. The mobile  
7 phase was composed of water and 2.0% acetic acid (1:1). The infusion lyophilized  
8 powder was suspended in methanol before analysis. The mobile phase flow rate was 1.0  
9 mL/min and the run time was 15 min. The retention time of EGCG was 4.5 min and the  
10 total amount of it was calculated using a standard curve ( $r^2 = 0.9967$ ) developed under  
11 the same conditions using an EGCG chemical standard ( $\geq 98.0\%$ , Sigma Aldrich Inc. -  
12 CAS Number 989-51-5. St. Louis, MO, USA).

13

14 *2.4. Antioxidant capacity by the 2,2'-Azinobis-[3-ethylbenzthiazoline-6-sulfonic acid]*  
15 *(ABTS) decolorization assay*

16 ABTS radical stabilization by the lyophilized tea extract was determined at a  
17 wavelength of 734 nm on an ultraviolet (UV)-spectrophotometer (BEL UV-M51, BEL  
18 Photonics, Italy), following the described method by RE et al.<sup>39</sup>. Different concentrations  
19 of trolox dissolved in ethanol (80 %) were used to prepare the calibration curve ( $r^2 =$   
20  $0.9996$ ). The antioxidant capacity by the ABTS method was expressed as µMol of trolox  
21 equivalent per gram of lyophilized samples of tea (µMol TE/g GTI).

22

23 *2.5. Antioxidant capacity by ferric reducing antioxidant power (FRAP) assay*

1           The FRAP assay was performed as described before <sup>40</sup>. An aliquot of the  
2 lyophilized extract resuspended in distilled water (1:25 w/v) was added to the FRAP  
3 reagent and incubated at 37°C for 30 min. The absorbance was determined at a 595 nm  
4 wavelength on an ultraviolet (UV)-spectrophotometer (BEL UV-M51, BEL Photonics,  
5 Italy). Different concentrations of ferrous sulphate (FeSO<sub>4</sub>) dissolved in distilled water  
6 were used to prepare the calibration curve ( $r^2 = 0.9985$ ). The antioxidant capacity by the  
7 FRAP method was expressed as  $\mu\text{Mol}$  of FeSO<sub>4</sub> equivalent per gram of lyophilized  
8 samples of tea ( $\mu\text{Mol FeSO}_4/\text{g GTI}$ ).

9

## 10 *2.6. Experimental design*

11           After seven days of acclimation in the bioterium, six rats were randomly selected  
12 to integrate the healthy control group. Type 1 diabetes was induced in 12 rats, after 12 h  
13 fasting by a single intraperitoneal (i.p.) injection of streptozotocin (STZ) (Sigma  
14 Chemical Co., St, Louis, MO, USA) at a dosage of 60mg/Kg of body weight (BW) diluted  
15 in 0.01 M sodium citrate buffer, pH 4.5. The control group received the buffer alone by  
16 the same administration route <sup>12</sup>. Two days after the STZ injection, following 12 h fasting,  
17 blood samples were collected from the tail vein and glycaemia was measured using a  
18 glucometer (Accu-Chek® Performa, Roche LTDA). All animals presented fasting blood  
19 glucose levels higher than 250 mg/dL and were included in the study. The hyperglycemic  
20 rats were divided into two groups (n = 6, each). Thus, the experimental protocol consisted  
21 in three groups: healthy control group (Ctrl, n = 6); diabetic control group (Diabetes, n =  
22 6); and the diabetic group treated with the green tea infusion (GTI diabetic, n = 6), which  
23 received a 100mg/Kg dosage of GTI, diluted in 0.6mL of water. The control groups  
24 received 0.6mL of water alone. All treatments (GTI and water) were administered by  
25 gavage, every day, during 42 days.

1           Considering that type 1 diabetes usually appears at young ages<sup>41</sup>, the experimental  
2 protocol started when the animals were 40 days old and finished when they reached 82  
3 days of age, (i.e. from periadolescence to the early adult phase)<sup>42</sup>.

4           After the experimental protocol period, the animals were euthanized by deep  
5 anesthesia (sodium thiopental, 60mg/Kg i.p.) followed by cardiac puncture and  
6 exsanguination<sup>33</sup>.

7

### 8 *2.7. Blood glucose, body weight and food and water consumption*

9           Fasting blood glucose was measured in blood samples from the tail vein using a  
10 glucometer and reactive strips (Accu-Chek® Performa, Roche LTDA. Jaguaré, SP,  
11 Brazil). Body weight, water and food consumption were measured using a precision scale  
12 (BEL M503, 0.001g, Piracicaba, SP, Brazil). All these parameters were monitored  
13 weekly.

14

### 15 *2.8. Murinometric and feeding parameters*

16           All the murinometric and feeding measurements were calculated as described by  
17 Nery et al.<sup>43</sup>. On the last day of the experimental protocol, the naso-anal length (NAL) of  
18 the rats was measured with an inelastic measuring tape ( $e = 0.1$  cm) to calculate the  
19 following indicators: Lee index (Lee) =  $\left[ \frac{3\sqrt{BW}}{NAL} \right]$  and Body Mass Index (BMI) =  $\frac{BW}{NAL^2}$ , where  
20 BW refers to the final body weight, and NAL, the naso-anal length. The following feeding  
21 indexes were also calculated: Specific Rate of Weight Gain (SRWG) =  $\frac{fBW - iBW}{iBW}$ , where  
22 iBW refers to body weight at the beginning of the experiment and fBW refers to the final  
23 BW. Feeding efficiency was indicated by the Coefficient of Feeding Efficiency (CFE)  
24 and Weight Gain per Caloric Consumption (WGCC), calculated as follows: CFE =  
25  $\frac{fBW - iBW}{tF}$ , where tF refers to the total amount of food ingested (g) in the experiment.



1  $WGCC = \frac{fBW - iBW}{tKcal}$ , where tKcal stands for the total amount of Kcal ingested in the  
2 experiment.

3

#### 4 *2.9. Dual-energy X-ray absorptiometry analysis*

5 Body composition was evaluated under anesthesia (sodium thiopental, 60mg/Kg  
6 i.p.) on the 36<sup>th</sup> day of treatment. The rats were positioned in ventral recumbency on the  
7 scan table. All scans were performed using dual-energy X-ray absorptiometry (DXA)  
8 (Lunar, DPX, Madison, WI, USA) to evaluate fat (% and g) and lean mass (%). An  
9 accelerating voltage of 100 kV with current of 0.188 mA and radiation dose of 10  
10 microGy were used for scanning. The Encore v.13 2011 (GE Healthcare Systems,  
11 Chicago, IL, USA) software system was used for data analysis. The results were  
12 expressed as a mean value.

13

#### 14 *2.10. Calorimetric analysis*

15 The oxygen (O<sub>2</sub>) consumption and carbon dioxide (CO<sub>2</sub>) production of the  
16 experimental animals were measured through gas analyzer (Oxylepto, Harvard  
17 Apparatus, Holliston, MA, USA) on the 40<sup>th</sup> day of treatment, without fasting. To that  
18 end, the ambient air was pumped through a metabolic chamber and samples of the  
19 extracted air were directed to the gas analyzer (air flow = 1.0 L/min). The Metabolism  
20 (Panlab, Barcelona, Spain) software system was used for data analysis. The animals  
21 remained for 60 minutes in the metabolic cage mimicking their real conditions in the  
22 laboratory for the determination VO<sub>2</sub> (mL/min/Kg<sup>0.75</sup>) and VCO<sub>2</sub> (mL/min/Kg<sup>0.75</sup>) at rest.  
23 The test was performed with animals from the three experimental groups, concomitantly,  
24 from 6 pm to 11 pm <sup>44</sup>.

1           The respiratory quotient (RQ) and the total 24 h energy expenditure rate (EE)  
2 (Kcal/day) were calculated using the following equations:  $RQ = VCO_2/VO_2$ , where  $VCO_2$   
3 refers to the volume of  $CO_2$  produced by the rats and  $VO_2$ , the  $O_2$  volume consumed  
4 during the assay; and  $EE = (3.815 + (1.232 * RQ)) * VO_2 * 1.44$  is used for energy  
5 expenditure.

6

### 7 *2.11. Statistical analysis*

8           All the results were submitted to the Shapiro-Wilk test for normality assessment.  
9 The data expressed as percentage were transformed by angular transformation before the  
10 analysis. The results were expressed as mean  $\pm$  standard deviation (mean  $\pm$  SD) and  
11 analyzed using unpaired Student's *t*-test when the variances were equal (by *F* test) and  
12 unpaired Student's *t*-test with Welch's correction for data with unequal variances (Ctrl vs  
13 Diabetes; Diabetes vs GTI diabetic). Statistical significance was established at  $P \leq 0.05$ .  
14 All tests and graphics were performed using the GraphPad Prism 6.0 statistical software  
15 system (GraphPad Software Inc., San Diego, CA, USA).

16

## 17 **3. Results**

### 18 *3.1. Green tea infusion phytochemical analysis*

19           The total amount phenolic components in the green tea infusion lyophilized  
20 powder was evidenced to be  $3.88 \pm 2.49$  mg GAE/g GTI. The EGCG content, analyzed  
21 by HPLC methodology, was shown to be 19.38% of the total GTI content. The extract  
22 presented an antioxidant capacity of  $3.26 \pm 0.06$   $\mu$ Mol TE/g GTI in the ABTS assay and  
23  $46.38 \pm 4.1$   $\mu$ Mol  $FeSO_4$ /g GTI in the FRAP assay.

24

### 25 *3.2. Green tea infusion increases glycaemia and favors the polydipsia in diabetic animals*

1           After diabetes induction and subsequent hyperglycaemia confirmation in the  
2 experimental animals (i.e. above 250 mg/dL), both diabetic groups maintained high  
3 blood glucose levels, which remained above 400 mg/dL, compared with the healthy  
4 control group (glucose < 100 mg/dL) in the last four weeks of the experimental protocol.  
5 Besides, GTI diabetic rats presented glycemic levels significantly aggravated ( $P =$   
6 0.0223; Fig. 1 B). Increased glucose levels were consistent with the consequent increment  
7 in water consumption in the same experimental groups (Fig. 1 D). The diabetic animals  
8 maintained high water consumption compared to the Ctrl group during the entire  
9 experiment. In the sixth week, this value was significantly higher for the GTI diabetic  
10 group ( $P = 0.0296$ ), compared with the diabetic animals that did not receive the green tea  
11 infusion and between the diabetic group compared with the healthy control group ( $P <$   
12 0.0001; Fig. 1 D).

13           Body weight (Fig. 1 E) presented normal evolution during the six weeks of the  
14 experimental protocol for the healthy control group, ranging from 100 to 280g from the  
15 first to the sixth week, respectively. In the diabetic animals, this weight gain was severely  
16 impaired and no additional weight was registered in these animals during the six weeks  
17 of the experiment. This deficiency was observed in the sixth week (Fig. 1 F).. Body  
18 weight gain decreased significantly in diabetic animals ( $P < 0.0001$ ), compared to the  
19 control. No differences for this variable were observed between the diabetic groups,  
20 treated with GTI or not. No statistic differences were observed for food ingestion between  
21 the control and the experimental groups (Fig. 1 G and H) during the six weeks of the  
22 study.

23

24    3.3. Diabetes changes murinometric and feeding parameters

1           The murinometric parameters indicate that the rats from the diabetic groups  
2 remained with similar body proportions, but were different from the healthy control  
3 group, as indicated by NAL and the BMI ( $P < 0.0001$ ; Table 1). The Lee index shows  
4 that body weight is proportional to NAL in all groups, regardless of the rat size.

5           Food intake did not differ throughout the experimental period and between  
6 experimental groups. However, the differences in BW and murinometric parameters can  
7 be explained by the feeding efficiency parameters. SRWG, CFE, and consequently  
8 WGCC, presented lower values in the diabetic groups ( $P < 0.0001$ ; Table 1F), which  
9 indicates decreased efficiency in the conversion of food nutrients into tissue components.

10

#### 11 *3.4. Green tea infusion reduces fat mass gain in diabetic animals*

12           The body composition examination revealed significant differences in the fat mass  
13 of the diabetic animals in both percentage levels (%) and absolute amount (g) when  
14 compared with the control animals ( $P < 0.0001$ ; Fig. 2 A and B, respectively). Green tea  
15 infusion accelerated this response by significantly reducing fat accumulation, which is  
16 demonstrated by the relative amount of fat at the end of the experiment ( $P = 0.0045$ ). It  
17 reached  $9.3 \pm 2.9\%$  of the total body weight with the minimum value of 5.8%. Similar  
18 behavior was observed in its absolute amount compared to the untreated diabetic animals  
19 ( $P = 0.0053$ ). Consequently, the relative lean mass (Fig. 2 C) represented a major portion  
20 of the body of the rats in the Diabetic group ( $P < 0.0001$ ) compared to the Ctrl, and even  
21 higher in the GTI diabetic ( $P = 0.005$ ) compared to the Diabetes group.

22

#### 23 *3.5. Green tea infusion elevates the energy expenditure of diabetic animals*

24           The calorimetric analysis revealed modulation in the metabolism of diabetic rats.  
25 Increased oxygen consumption was observed in the Diabetes group ( $P = 0.0058$ ; Fig. 3

1 A) resulting in higher energy expenditure throughout the day ( $P = 0.0106$ ; Fig. 3 D). On  
2 the other hand, animals treated with the GTI presented higher oxygen consumption and  
3 EE, when compared with the diabetic group that received the placebo treatment (water)  
4 ( $P < 0.05$ ; Fig. 3 A and D). As shown in Fig. 3 C, the respiratory quotient (RQ) of the  
5 diabetic groups was lower, compared to the results of the control group ( $P = 0.0010$ ),  
6 which indicates variation in the preferential macronutrient substrate used for energy  
7 generation.

8

#### 9 **4. Discussion**

10 Large amount of catechins are found in green tea (i.e. obtained from the *Camellia*  
11 *sinensis* L.). Their effects have been extensively explored<sup>45-47</sup> due to their potential health  
12 benefits in the treatment and prevention of human diseases. Its antidiabetic properties  
13 have been proven in previous studies<sup>17-19</sup>, but this is the first time that strong evidence is  
14 reported that green tea infusion has great impact on glycaemia, body composition,  
15 nutritional status and metabolic activity in young streptozotocin-induced diabetic rats.

16 Admittedly, regarding the hypoglycemic effects of green tea and its components,  
17 specifically EGCG, important therapeutic potential has been demonstrated under  
18 experimental conditions<sup>1,14,15,48,49</sup>. This, in turn, has been closely related to the potential  
19 of this substance to increase insulin activity<sup>19,50</sup>. However, it was observed that green tea  
20 containing a proven amount of 19.38% of EGCG contributed differently in that  
21 parameter. The diabetic animals treated with green tea presented considerably higher  
22 blood glucose levels compared to the untreated rats. Streptozotocin, used in our study to  
23 induce the diabetic condition in the experimental animals, destroys the pancreatic insulin  
24 producer beta cells, leading to hyperglycemic condition<sup>51</sup>. Thus, a positive relation  
25 cannot be attributed to the interaction between tea catechins and insulin. Therefore, it is

1 possible to hypothesize that the maintenance of hyperglycaemia by GTI in our  
2 investigation may be related to the differential expression of glucose transporters or  
3 alterations in energetic metabolic pathways.

4 Aligned with this perspective, Kobayashi et al.<sup>52</sup> showed that green tea catechins  
5 can inhibit the sodium-dependent glucose transporter 1 (SGLT1) in the brush-border  
6 membrane of enterocytes. This *in vitro* study, using brush-border membrane vesicles  
7 obtained from the small intestine of healthy rabbits, demonstrates that catechins  
8 containing the galloyl radical (epicatechin gallate and EGCG) were shown to bind to  
9 SGLT1, rendering the transporter unusable. Due to the inhibition of glucose uptake by  
10 the intestine and consequent drop in blood glucose, such an outcome could be  
11 encouraging. However, animals with STZ-induced diabetes are able to express another  
12 glucose transporter at the brush-border and basolateral membranes of enterocytes, such  
13 as transporter GLUT1, which is not expressed on the brush membrane of enterocytes in  
14 healthy animals<sup>53</sup>, and GLUT2, that is inserted in the brush-border membrane when the  
15 luminal amount of glucose is still significant<sup>54-56</sup>. GLUT1 expression, combined with  
16 GLUT2 regulation, maintains intestinal glucose uptake, regardless of the inactivation of  
17 SGLT1, thus preserving the hyperglycemic condition of the STZ-diabetic animal.

18 It is well established that persistently elevated glycaemia exacerbates the  
19 symptoms of type 1 diabetes (i.e. polyuria, polyphagia, polydipsia, extreme fatigue,  
20 weight loss despite high food intake), as reviewed by Ullah et al.<sup>8</sup>. Green tea contributed  
21 to aggravate these symptoms, since tea in our study reinforces the maintenance of  
22 hyperglycaemia. Although polyphagia is also a symptomatic consequence of type 1  
23 diabetes<sup>8</sup>, all groups presented similar food consumption throughout the experiment. On  
24 the other hand, body weight was compromised in diabetic animals, regardless of GTI  
25 intake. In contrast, studies were consistent in showing a positive relationship between

1 green tea consumption and increased body weight gain in untreated experimental type 1  
2 diabetes<sup>13–15</sup>. However, in these studies, diabetes was induced in adult animals already  
3 presenting an optimal level of body development. We believe that the fact that diabetes  
4 was induced in animals at periadolescent age has caused the poor development and  
5 compromised weight gain observed during the six weeks of study.

6 Those differences in body weight, combined with similar levels of food  
7 consumption generated lower values of feeding efficiency features in our experimental  
8 model. Thus, the specific rate of weight gain as well as the coefficient of feeding  
9 efficiency and weight gain per caloric consumption were significantly lower in diabetic  
10 groups regardless of green tea consumption. Aligned with this perspective, other studies  
11 had already shown clear evidence that confirm these findings<sup>57–59</sup>. These data reveal  
12 reduced efficiency in food nutrient conversion into tissue components, as previously  
13 described<sup>35</sup>. Herrero et al.<sup>60</sup> attributed this fact to the lack of plasma insulin, which  
14 prevents the transport of glucose to insulin-dependent cells (i.e. adipocytes, myocytes and  
15 cardiomyocytes), thereby forcing changes in metabolic routes so as to increase fat use.

16 This impairment in weight gain also delayed the body development of the diabetic  
17 rats. This finding can be corroborated by both the growth impairment of their naso-anal  
18 length and the stagnant fat mass accumulation observed in the X-ray absorptiometry  
19 scanning. According to Silva et al.<sup>34</sup>, when diabetes occurs at young age, it may  
20 compromise normal bone development. We did not directly evaluate this tissue, but some  
21 studies consistently point out the positive relation between diabetes and poor bone  
22 mineral metabolism and consequent impaired animal growth<sup>34,35</sup>. This condition impacts  
23 the rate of bone mineral apposition and decreases the activity of osteoblastic cells, which  
24 leads to premature bone growth interruption, with consequent impairment to bone  
25 development in murine models of type 1 diabetes induced by STZ or alloxan. These facts

1 consequently impair the length and size development of diabetic animals<sup>34,35</sup>. We also  
2 proved their negative impact on the body composition of diabetic animals, in which  
3 impaired fat mass gain was aggravated when green tea was administered.

4 It has been discussed the relation between the EGCG, present in green tea, and  
5 increased lipolysis secondary to glucagon secretion<sup>61,62</sup>. Studies have shown that EGCG  
6 is a potent inhibitor of the enzyme catechol-o-methyltransferase (COMT), which  
7 degrades norepinephrine<sup>63,64</sup>. Norepinephrine persistence maintains beta adrenergic  
8 stimuli in pancreatic alpha cells, which increases glucagon production and release<sup>65</sup>.  
9 Without inhibition by insulin, glucagon stimulates glycogenolysis in the liver until the  
10 depletion of the glycogen stocks<sup>61</sup>. At this point, glucagon also stimulates  
11 gluconeogenesis, leading to the production of glucose from other substrates, such as  
12 proteins, besides increasing lipolysis and reducing fat deposits<sup>61,66</sup>. Although we have  
13 not quantified glucagon, these mechanisms can explain the green tea impact on body  
14 composition in diabetic animals.

15 This persistent activation of the beta adrenergic stimuli mediated by green tea  
16 catechins in the pancreatic alpha cells, as previously described, corroborates the findings  
17 of higher oxygen consumption ( $VO_2$ ) and daily energy expenditure (EE: Kcal/day/Kg<sup>0.75</sup>)  
18 in diabetic animals treated with tea in our study. Type 1 diabetes induces higher oxygen  
19 consumption by modulating the energetic metabolism and the substrate utilization in  
20 energy production<sup>60,67</sup>. Qualitatively, the respiratory quotient (RQ) indicates the types of  
21 energy substrate the animal preferentially consumes. Our control animals presented an  
22 RQ ranging between 0.9 and 1.0, which indicates a preference for carbohydrate  
23 hydrolysis. On the other hand, diabetic groups presented an RQ between 0.7 and 0.9,  
24 which indicates major fat oxidation for energy production<sup>68-70</sup>. Tea catechins are linked  
25 to an improved expression of proteins related to beta oxidation and thermogenic capacity



1 <sup>27,71,72</sup>. Both mechanisms require an expanded mitochondrial activity that, in turn, leads  
2 to an increased demand of oxygen <sup>8,73</sup>. We measured and demonstrated that the diabetic  
3 animals consumed more oxygen than the healthy control group. The green tea treatment,  
4 in contrast, increased oxygen consumption, which reflected in the daily energy  
5 expenditure of the rats treated with tea, maybe due to increased metabolic rate and/or the  
6 stimulation of lipolysis, beta oxidation and thermogenesis.

7 Treating young type 1 diabetic animals with green tea or its catechins seems to be  
8 a two-way pathway. At first, the use of tea and its molecules with highly antioxidant  
9 capacity seems effective against diabetes complications, as exhaustively described by the  
10 scientific literature. However, these molecules have other activities. They increase the  
11 mobilization and use of fat as energy source by the organism and even stimulate  
12 thermogenesis, processes that generate large amounts of reactive oxygen species.  
13 Catechins also contribute to maintain the hyperglycaemia by glycogenolysis and  
14 gluconeogenesis stimulated by glucagon. The most likely explanation for the lack of  
15 hypoglycemic effect of green tea combined with the impaired fat mass gain and increased  
16 energy expenditure in this study seems to be the hypothesis of COMT inhibition with  
17 consequent prolongation of beta adrenergic pathway stimulation in pancreatic alpha cells  
18 and thermogenic adipocytes.

19 In experimental type 1 diabetes not treated with insulin in young animals, the  
20 effect of green tea remains controversial. Even with the previously reported beneficial  
21 effects, these results are subject to factors such as the age at which the disease is induced.  
22 Collectively, we propose that 1) the studied parameters behave differently when observed  
23 in animals with type 1 diabetes induced at periadolescence or younger ages, when the  
24 disease is aggravated. 2) When diabetes appears at the juvenile ages, the green tea  
25 treatment increases glycaemia, changes body composition by reducing the fat content and

1 increases oxygen consumption. It affects energy expenditure and worsens the nutritional  
2 status of the young type 1 diabetic rat.

3

#### 4 **Acknowledgements**

5 The authors are thankful to Farias, L. M. of the Laboratory of Biodiversity of the  
6 UFV for the chemical analysis in HPLC of the green tea extract; Dominik, D. J. S. for the  
7 assistance with logistics and the experiment; Magalhães, C. O. D. for the DXA scanning;  
8 Silva, M. R. for the statistical insights; Sacramento, E. for the English language review;  
9 da Silva, J. for the manuscript review and Coordenação de Aperfeiçoamento de Pessoal  
10 de Nível Superior (CAPES) for the L. C. M. Ladeira Ph.D. scholarship (Procs. Nr.  
11 88882.436984/2019-01).

12

#### 13 **Conflict of interest**

14 The authors declare that they have no conflict of interest.

15

#### 16 **Funding Statement**

17 This paper was supported by a grant from the Brazilian agency Capes (Coordination for  
18 the Improvement of Higher Education Personnel, Procs. Nr. 88882.436984/2019-01).

19

20

#### 21 **References**

22 1. Al Hroob AM, Abukhalil MH, Hussein OE, Mahmoud AM. Pathophysiological  
23 mechanisms of diabetic cardiomyopathy and the therapeutic potential of  
24 epigallocatechin-3-gallate. *Biomed Pharmacother.* 2019;109(October  
25 2018):2155-2172. doi:10.1016/j.biopha.2018.11.086.

- 1 2. World Health Organization. *Global Report on Diabetes*. Geneva; 2016.
- 2 3. Ogurtsova K, da Rocha Fernandes JD, Huang Y, et al. IDF Diabetes Atlas:  
3 Global estimates for the prevalence of diabetes for 2015 and 2040. *Diabetes Res*  
4 *Clin Pract*. 2017;128:40-50. doi:10.1016/j.diabres.2017.03.024.
- 5 4. Chawla A, Chawla R, Jaggi S. Microvascular and macrovascular complications in  
6 diabetes mellitus: Distinct or continuum? *Indian J Endocrinol Metab*.  
7 2016;20(4):546. doi:10.4103/2230-8210.183480.
- 8 5. Mohamed J, Nazratun Nafizah AH, Zariyantey AH, Budin SB. Mechanisms of  
9 diabetes-induced liver damage: The role of oxidative stress and inflammation.  
10 *Sultan Qaboos Univ Med J*. 2016;16(2):e132-e141.  
11 doi:10.18295/squmj.2016.16.02.002.
- 12 6. Sertorio MN, Souza ACF, Bastos DSS, et al. Arsenic exposure intensifies  
13 glycogen nephrosis in diabetic rats. *Environ Sci Pollut Res*. 2019;26(12):12459-  
14 12469. doi:10.1007/s11356-019-04597-1.
- 15 7. Levelt E, Gulsin G, Neubauer S, McCann GP. Diabetic cardiomyopathy:  
16 pathophysiology and potential metabolic interventions state of the art review. *Eur*  
17 *J Endocrinol*. 2018;178(4):R127-R139. doi:10.1530/EJE-17-0724.
- 18 8. Ullah A, Khan A, Khan I. Diabetes mellitus and oxidative stress—A concise  
19 review. *Saudi Pharm J*. 2016;24(5):547-553. doi:10.1016/j.jsps.2015.03.013.
- 20 9. Sociedade Brasileira de Diabetes. *Diretrizes - Sociedade Brasileira de Diabetes*  
21 *2017-2018*.; 2017.
- 22 10. Silva E, Natali AÔJ, Silva MF, et al. Ventricular remodeling in growing rats with  
23 experimental diabetes: The impact of swimming training. *Pathol Res Pract*.

- 1           2013;209(10):618-626. doi:10.1016/j.prp.2013.06.009.
- 2    11.    da Silva MF, Natali AJ, da Silva E, et al. Attenuation of Ca<sup>2+</sup> homeostasis,  
3           oxidative stress, and mitochondrial dysfunctions in diabetic rat heart: insulin  
4           therapy or aerobic exercise? *J Appl Physiol*. 2015;119(2):148-156.  
5           doi:10.1152/jappphysiol.00915.2014.
- 6    12.    da Silva E, Natali AJ, da Silva MF, et al. Swimming training attenuates the  
7           morphological reorganization of the myocardium and local inflammation in the  
8           left ventricle of growing rats with untreated experimental diabetes. *Pathol - Res*  
9           *Pract*. 2016;212(4):325-334. doi:10.1016/j.prp.2016.02.005.
- 10   13.    Babu PVA, Sabitha KE, Srinivasan P, Shyamaladevi CS. Green tea attenuates  
11           diabetes induced Maillard-type fluorescence and collagen cross-linking in the  
12           heart of streptozotocin diabetic rats. *Pharmacol Res*. 2007;55(5):433-440.  
13           doi:10.1016/j.phrs.2007.01.019.
- 14   14.    Samarghandian S, Azimi-Nezhad M, Farkhondeh T. Catechin Treatment  
15           Ameliorates Diabetes and Its Complications in Streptozotocin-Induced Diabetic  
16           Rats. *Dose-Response*. 2017;15(1):155932581769115.  
17           doi:10.1177/1559325817691158.
- 18   15.    Othman AI, El-Sawi MR, El-Missiry MA, Abukhalil MH. Epigallocatechin-3-  
19           gallate protects against diabetic cardiomyopathy through modulating the  
20           cardiometabolic risk factors, oxidative stress, inflammation, cell death and  
21           fibrosis in streptozotocin-nicotinamide-induced diabetic rats. *Biomed*  
22           *Pharmacother*. 2017;94:362-373. doi:10.1016/j.biopha.2017.07.129.
- 23   16.    Latief U, Ahmad R. Herbal remedies for liver fibrosis: A review on the mode of  
24           action of fifty herbs. *J Tradit Complement Med*. 2018;8(3):352-360.

- 1           doi:10.1016/j.jtcme.2017.07.002.
- 2    17.   Roghani M, Baluchnejadmojarad T. Hypoglycemic and hypolipidemic effect and  
3           antioxidant activity of chronic epigallocatechin-gallate in streptozotocin-diabetic  
4           rats. *Pathophysiology*. 2010;17(1):55-59. doi:10.1016/j.pathophys.2009.07.004.
- 5    18.   Li T, Liu J, Zhang X, Ji G. Antidiabetic activity of lipophilic (-)-  
6           epigallocatechin-3-gallate derivative under its role of  $\alpha$ -glucosidase inhibition.  
7           *Biomed Pharmacother*. 2007;61(1):91-96. doi:10.1016/j.biopha.2006.11.002.
- 8    19.   Anderson RA, Polansky MM. Tea Enhances Insulin Activity. *J Agric Food*  
9           *Chem*. 2002;50(24):7182-7186. doi:10.1021/jf020514c.
- 10   20.   Zeng X, Tan X. Epigallocatechin-3-gallate and zinc provide anti-apoptotic  
11           protection against hypoxia/reoxygenation injury in H9c2 rat cardiac myoblast  
12           cells. *Mol Med Rep*. 2015;12(2):1850-1856. doi:10.3892/mmr.2015.3603.
- 13   21.   Baluchnejadmojarad T, Roghani M. Chronic Oral Epigallocatechin-gallate  
14           Alleviates Streptozotocin-induced Diabetic Neuropathic Hyperalgesia in Rat:  
15           Involvement of Oxidative Stress. *Iran J Pharm Res IJPR*. 2012;11(4):1243-  
16           1253. <http://www.ncbi.nlm.nih.gov/pubmed/24250559>.
- 17   22.   Waltner-Law ME, Wang XL, Law BK, Hall RK, Nawano M, Granner DK.  
18           Epigallocatechin Gallate, a Constituent of Green Tea, Represses Hepatic Glucose  
19           Production. *J Biol Chem*. 2002;277(38):34933-34940.  
20           doi:10.1074/jbc.M204672200.
- 21   23.   Collins QF, Liu H-Y, Pi J, Liu Z, Quon MJ, Cao W. Epigallocatechin-3-gallate  
22           (EGCG), A Green Tea Polyphenol, Suppresses Hepatic Gluconeogenesis through  
23           5'-AMP-activated Protein Kinase. *J Biol Chem*. 2007;282(41):30143-30149.

- 1           doi:10.1074/jbc.M702390200.
- 2   24.   Li Y, Zhao S, Zhang W, et al. Epigallocatechin-3-O-gallate (EGCG) attenuates  
3           FFAs-induced peripheral insulin resistance through AMPK pathway and insulin  
4           signaling pathway in vivo. *Diabetes Res Clin Pract.* 2011;93(2):205-214.  
5           doi:10.1016/j.diabres.2011.03.036.
- 6   25.   Tang W, Li S, Liu Y, Huang M-T, Ho C-T. Anti-diabetic activity of chemically  
7           profiled green tea and black tea extracts in a type 2 diabetes mice model via  
8           different mechanisms. *J Funct Foods.* 2013;5(4):1784-1793.  
9           doi:10.1016/j.jff.2013.08.007.
- 10 26.   Choo JJ. Green tea reduces body fat accretion caused by high-fat diet in rats  
11           through  $\alpha$ -adrenoceptor activation of thermogenesis in brown adipose tissue. *J*  
12           *Nutr Biochem.* 2003;11:671-676. doi:10.1016/j.nutbio.2003.08.005.
- 13 27.   Sae-tan S, Rogers CJ, Lambert JD. Voluntary exercise and green tea enhance the  
14           expression of genes related to energy utilization and attenuate metabolic  
15           syndrome in high fat fed mice. *Mol Nutr Food Res.* 2014;58(5):1156-1159.  
16           doi:10.1002/mnfr.201300621.
- 17 28.   Stohs SJ, Badmaev V. A Review of Natural Stimulant and Non-stimulant  
18           Thermogenic Agents. *Phyther Res.* 2016;30(5):732-740. doi:10.1002/ptr.5583.
- 19 29.   Türközü D, Tek NA. A minireview of effects of green tea on energy expenditure.  
20           *Crit Rev Food Sci Nutr.* 2017;57(2):254-258.  
21           doi:10.1080/10408398.2014.986672.
- 22 30.   Yoneshiro T, Matsushita M, Hibi M, et al. Tea catechin and caffeine activate  
23           brown adipose tissue and increase cold-induced thermogenic capacity in humans.

- 1            *Am J Clin Nutr.* 2017;105(4):873-881. doi:10.3945/ajcn.116.144972.
- 2    31.    Islam MS, Choi H. Green tea, anti-diabetic or diabetogenic: A dose response  
3            study. *BioFactors.* 2007;29(1):45-53. doi:10.1002/biof.5520290105.
- 4    32.    Rasheed NOA, Ahmed LA, Abdallah DM, El-Sayeh BM. Nephro-toxic effects of  
5            intraperitoneally injected EGCG in diabetic mice: involvement of oxidative  
6            stress, inflammation and apoptosis. *Sci Rep.* 2017;7(1):40617.  
7            doi:10.1038/srep40617.
- 8    33.    Rasheed NOA, Ahmed LA, Abdallah DM, El-Sayeh BM. Paradoxical  
9            cardiotoxicity of intraperitoneally-injected epigallocatechin gallate preparation in  
10            diabetic mice. *Sci Rep.* 2018;8(1):7880. doi:10.1038/s41598-018-25901-y.
- 11    34.    Silva MJ, Brodt MD, Lynch MA, et al. Type 1 Diabetes in Young Rats Leads to  
12            Progressive Trabecular Bone Loss, Cessation of Cortical Bone Growth, and  
13            Diminished Whole Bone Strength and Fatigue Life. *J Bone Miner Res.*  
14            2009;24(9):1618-1627. doi:10.1359/jbmr.090316.
- 15    35.    Locatto ME, Abranzon H, Caferra D, Fernandez M del C, Alloatti R, Puche RC.  
16            Growth and development of bone mass in untreated alloxan diabetic rats. Effects  
17            of collagen glycosylation and parathyroid activity on bone turnover. *Bone Miner.*  
18            1993;23(2):129-144. doi:10.1016/S0169-6009(08)80049-9.
- 19    36.    Perva-Uzunalić A, Škerget M, Knez Ž, Weinreich B, Otto F, Grüner S.  
20            Extraction of active ingredients from green tea (*Camellia sinensis*): Extraction  
21            efficiency of major catechins and caffeine. *Food Chem.* 2006;96(4):597-605.  
22            doi:10.1016/j.foodchem.2005.03.015.
- 23    37.    Singleton VL, Rossi JA, Jr J. Colorimetry of Total Phenolics With

- 1           Phosphomolybdic-Phosphotungstic Acid Reagents. *Am J Enol Vitic.*  
2           1965;16(3):144-158.
- 3    38.   Kim-Park WK, Allam ES, Palasuk J, Kowolik M, Park KK, Windsor LJ. Green  
4           tea catechin inhibits the activity and neutrophil release of Matrix  
5           Metalloproteinase-9. *J Tradit Complement Med.* 2016;6(4):343-346.  
6           doi:10.1016/j.jtcme.2015.02.002.
- 7    39.   Re R, Pellegrini N, Proteggente A, Pannala A, Yang M, Rice-Evans C.  
8           Antioxidant activity applying an improved ABTS radical cation decolorization  
9           assay. *Free Radic Biol Med.* 1999;26(9-10):1231-1237. doi:10.1016/S0891-  
10          5849(98)00315-3.
- 11   40.   Benzie IFF, Strain JJ. The Ferric Reducing Ability of Plasma (FRAP) as a  
12          Measure of “Antioxidant Power”: The FRAP Assay. *Anal Biochem.*  
13          1996;239(1):70-76. doi:10.1006/abio.1996.0292.
- 14   41.   Haidara MA, Mikhailidis DP, Rateb MA, et al. Evaluation of the effect of  
15          oxidative stress and vitamin E supplementation on renal function in rats with  
16          streptozotocin-induced Type 1 diabetes. *J Diabetes Complications.*  
17          2009;23(2):130-136. doi:10.1016/j.jdiacomp.2008.02.011.
- 18   42.   Sengupta P. The Laboratory Rat: Relating Its Age With Human’s. *Int J Prev*  
19          *Med.* 2013;4(6):624-630.  
20          <http://www.ncbi.nlm.nih.gov/pubmed/23930179>[http://www.pubmedcentral.](http://www.pubmedcentral.nih.gov/articlerender.fcgi?artid=PMC3733029)  
21          [nih.gov/articlerender.fcgi?artid=PMC3733029.](http://www.pubmedcentral.nih.gov/articlerender.fcgi?artid=PMC3733029)
- 22   43.   Nery C da S, Pinheiro IL, Muniz G de S, de Vasconcelos DAA, de França SP, do  
23          Nascimento E. Murinometric evaluations and feed efficiency in rats from reduced  
24          litter during lactation and submitted or not to swimming exercise. *Rev Bras Med*



- 1            *do Esporte*. 2011;17(1):49-55. doi:10.1590/S1517-86922011000100010.
- 2    44.    Melo DS, Costa-Pereira L V., Santos CS, et al. Severe Calorie Restriction  
3            Reduces Cardiometabolic Risk Factors and Protects Rat Hearts from  
4            Ischemia/Reperfusion Injury. *Front Physiol*. 2016;7(APR):1-8.  
5            doi:10.3389/fphys.2016.00106.
- 6    45.    Khan N, Mukhtar H. Tea polyphenols for health promotion. *Life Sci*.  
7            2007;81(7):519-533. doi:10.1016/j.lfs.2007.06.011.
- 8    46.    da Silva Pinto M. Tea: A new perspective on health benefits. *Food Res Int*.  
9            2013;53(2):558-567. doi:10.1016/j.foodres.2013.01.038.
- 10    47.    Sharangi AB. Medicinal and therapeutic potentialities of tea (*Camellia sinensis*  
11            L.) – A review. *Food Res Int*. 2009;42(5-6):529-535.  
12            doi:10.1016/j.foodres.2009.01.007.
- 13    48.    Chung J-O, Yoo S-H, Lee Y-E, et al. Hypoglycemic potential of whole green tea:  
14            water-soluble green tea polysaccharides combined with green tea extract delays  
15            digestibility and intestinal glucose transport of rice starch. *Food Funct*.  
16            2019;10(2):746-753. doi:10.1039/C8FO01936C.
- 17    49.    Fu Q-Y, Li Q-S, Lin X-M, et al. Antidiabetic Effects of Tea. *Molecules*.  
18            2017;22(5):849. doi:10.3390/molecules22050849.
- 19    50.    Yan J, Zhao Y, Suo S, Liu Y, Zhao B. Green tea catechins ameliorate adipose  
20            insulin resistance by improving oxidative stress. *Free Radic Biol Med*.  
21            2012;52(9):1648-1657. doi:10.1016/j.freeradbiomed.2012.01.033.
- 22    51.    Wei K, Eckmanns T, Oppert M, et al. The Streptozotocin-Diabetic Chronic  
23            Complications Rat as a Model of the of Human Diabetes. *Hear Lung Circ*.

- 1           2003:1-20. doi:10.1067/mod.2000.104493.
- 2   52.   Kobayashi Y, Suzuki M, Satsu H, et al. Green Tea Polyphenols Inhibit the  
3           Sodium-Dependent Glucose Transporter of Intestinal Epithelial Cells by a  
4           Competitive Mechanism. *J Agric Food Chem.* 2000;48(11):5618-5623.  
5           doi:10.1021/jf0006832.
- 6   53.   Boyer S, Sharp PA, Debnam ES, Baldwin SA, Srai SKS. Streptozotocin diabetes  
7           and the expression of GLUT1 at the brush border and basolateral membranes of  
8           intestinal enterocytes. *FEBS Lett.* 1996;396(2-3):218-222. doi:10.1016/0014-  
9           5793(96)01102-7.
- 10  54.   Wong TP, Debnam ES, Leung PS. Diabetes mellitus and expression of the  
11           enterocyte renin-angiotensin system: implications for control of glucose transport  
12           across the brush border membrane. *Am J Physiol Physiol.* 2009;297(3):C601-  
13           C610. doi:10.1152/ajpcell.00135.2009.
- 14  55.   Kellett GL, Brot-Laroche E, Mace OJ, Leturque A. Sugar Absorption in the  
15           Intestine: The Role of GLUT2. *Annu Rev Nutr.* 2008;28(1):35-54.  
16           doi:10.1146/annurev.nutr.28.061807.155518.
- 17  56.   Corpe CP, Basaleh MM, Affleck J, Gould G, Jess TJ, Kellett GL. The regulation  
18           of GLUT5 and GLUT2 activity in the adaptation of intestinal brush-border  
19           fructose transport in diabetes. *Pflügers Arch - Eur J Physiol.* 1996;432(2):192-  
20           201. doi:10.1007/s004240050124.
- 21  57.   Al-Malki AL, El Rabey HA. The Antidiabetic Effect of Low Doses of Moringa  
22           oleifera Lam. Seeds on Streptozotocin Induced Diabetes and Diabetic  
23           Nephropathy in Male Rats. *Biomed Res Int.* 2015;2015:1-13.  
24           doi:10.1155/2015/381040.

- 1 58. Choi D, Piao Y, Yu S-J, et al. Antihyperglycemic and antioxidant activities of  
2 polysaccharide produced from *Pleurotus ferulae* in streptozotocin-induced  
3 diabetic rats. *Korean J Chem Eng*. 2016;33(6):1872-1882. doi:10.1007/s11814-  
4 016-0007-8.
- 5 59. Hwang H-J, Kim S-W, Lim J-M, et al. Hypoglycemic effect of crude  
6 exopolysaccharides produced by a medicinal mushroom *Phellinus baumii* in  
7 streptozotocin-induced diabetic rats. *Life Sci*. 2005;76(26):3069-3080.  
8 doi:10.1016/j.lfs.2004.12.019.
- 9 60. Herrero P, Peterson LR, McGill JB, et al. Increased Myocardial Fatty Acid  
10 Metabolism in Patients With Type 1 Diabetes Mellitus. *J Am Coll Cardiol*.  
11 2006;47(3):598-604. doi:10.1016/j.jacc.2005.09.030.
- 12 61. Quesada I, Tudurí E, Ripoll C, Nadal Á. Physiology of the pancreatic  $\alpha$ -cell and  
13 glucagon secretion: role in glucose homeostasis and diabetes. *J Endocrinol*.  
14 2008;199(1):5-19. doi:10.1677/JOE-08-0290.
- 15 62. Slavin BG, Ong JM, Kern PA. Hormonal regulation of hormone-sensitive lipase  
16 activity and mRNA levels in isolated rat adipocytes. *J Lipid Res*.  
17 1994;35(9):1535-1541. <http://www.ncbi.nlm.nih.gov/pubmed/7806967>.
- 18 63. Lu H. Enzymology of Methylation of Tea Catechins and Inhibition of Catechol-  
19 O-methyltransferase by (-)-Epigallocatechin Gallate. *Drug Metab Dispos*.  
20 2003;31(5):572-579. doi:10.1124/dmd.31.5.572.
- 21 64. Shixian Q, VanCrey B, Shi J, Kakuda Y, Jiang Y. Green Tea Extract  
22 Thermogenesis-Induced Weight Loss by Epigallocatechin Gallate Inhibition of  
23 Catechol- O -Methyltransferase. *J Med Food*. 2006;9(4):451-458.  
24 doi:10.1089/jmf.2006.9.451.

- 1 65. Sorenson RL, Elde RP, Seybold V. Effect of Norepinephrine on Insulin,  
2 Glucagon, and Somatostatin Secretion in Isolated Perfused Rat Islets. *Diabetes*.  
3 1979;28(10):899-904. doi:10.2337/diab.28.10.899.
- 4 66. Burcelin R, Eddouks M, Maury J, Kande J, Assan R, Girard J. Excessive glucose  
5 production, rather than insulin resistance, accounts for hyperglycaemia in recent-  
6 onset streptozotocin-diabetic rats. *Diabetologia*. 1995;38(3):283-290.  
7 doi:10.1007/BF00400632.
- 8 67. Vergès B. Lipid disorders in type 1 diabetes. *Diabetes Metab*. 2009;35(5):353-  
9 360. doi:10.1016/j.diabet.2009.04.004.
- 10 68. Livesey G, Elia M. Estimation of energy expenditure, net carbohydrate  
11 utilization, and net fat oxidation and synthesis by indirect calorimetry: evaluation  
12 of errors with special reference to the detailed composition of fuels. *Am J Clin*  
13 *Nutr*. 1988;47(4):608-628. doi:10.1093/ajcn/47.4.608.
- 14 69. Peronnet F, Massicotte D. Table of nonprotein respiratory quotient: an update.  
15 *Can J Sport Sci*. 1991;16:23-29.
- 16 70. Pujia A, Mazza E, Ferro Y, et al. Lipid Oxidation Assessed by Indirect  
17 Calorimetry Predicts Metabolic Syndrome and Type 2 Diabetes. *Front*  
18 *Endocrinol (Lausanne)*. 2019;9(January):1-7. doi:10.3389/fendo.2018.00806.
- 19 71. Sae-tan S, Grove KA, Kennett MJ, Lambert JD. (-)-Epigallocatechin-3-gallate  
20 increases the expression of genes related to fat oxidation in the skeletal muscle of  
21 high fat-fed mice. *Food Funct*. 2011;2(2):111. doi:10.1039/c0fo00155d.
- 22 72. Sae-tan S, Rogers CJ, Lambert JD. Decaffeinated green tea and voluntary  
23 exercise induce gene changes related to beige adipocyte formation in high fat-fed

1 obese mice. *J Funct Foods*. 2015;14:210-214. doi:10.1016/j.jff.2015.01.036.

2 73. Barja de Quiroga G. Brown fat thermogenesis and exercise: two examples of

3 physiological oxidative stress? *Free Radic Biol Med*. 1992;13(4):325-340.

4 <http://www.ncbi.nlm.nih.gov/pubmed/1398216>.

5

6

7

8

9

10

11

12

13

14

15

16

17

18

19

20

## 1 **Figure Captions**

2

3 **Fig. 1.** Body weight, food and water intake, and glucose levels of male Wistar healthy  
4 and diabetic rats treated with green tea infusion. **A** - 12h fasting blood glucose (mg/dL).  
5 **C** - Daily average water consumption (mL). **E** - Body weight (g) measured weekly. **G** -  
6 Daily average food ingestion (g). The **B, D, F** and **H** graphs represent the same variables  
7 featured in the last week of the experiment. Mean  $\pm$  SD. In the A, C, E and G graphs, the  
8 asterisk (\*) indicates that Diabetes group is statistically different from Ctrl, and the hash  
9 (#) indicates that GTI diabetic is different from the Diabetes group. The statistical  
10 differences are indicated with bars at the B, D, F and H graphs, with the *P* value above  
11 the bars. The data were compared (Ctrl vs Diabetes; Diabetes vs GTI diabetic),  
12 considering statistical differences when  $P \leq 0.05$ . (n = 6 animals/group).

13

14 **Fig. 2.** Body composition of male Wistar healthy and diabetic rats treated with green tea  
15 infusion. **A** – Relative fat mass (%). **B** – Absolute fat mass (g). **C** – Relative lean mass  
16 (%). The data are represented as Mean  $\pm$  SD. The statistical differences are indicated with  
17 bars in the graphs, with the *p* value above the bars. The data were compared (Ctrl vs  
18 Diabetes; Diabetes vs GTI diabetic) considering statistical differences when  $P \leq 0.05$ . (n  
19 = 6 animals/group).

20

21 **Fig. 3.** Calorimetric analysis of male Wistar healthy and diabetic rats treated with green  
22 tea infusion. **A** -  $VO_2$ , average volume of oxygen consumed (mL/min/Kg<sup>0.75</sup>). **B** -  $VCO_2$ ,  
23 average volume of carbon dioxide produced (mL/min/Kg<sup>0.75</sup>). **C** - Respiratory quotient.  
24 **D** - Daily energy expenditure (EE) (Kcal/day/Kg<sup>0.75</sup>). The data are presented as Mean  $\pm$   
25 SD. The box represents the interquartile interval with the mean indicated (horizontal line),

1 and the whiskers represent the superior and inferior quartiles. The statistical differences  
2 are indicated with bars in the graphs, with the  $P$  value above the bars. The data were  
3 compared (Ctrl vs Diabetes; Diabetes vs GTI diabetic) considering statistical differences  
4 when  $P \leq 0.05$ . (n = 6 animals/group).

5

6

7

8

9

10

11

12

13

14

15

16

17

18

19

20

21

22

23

24

25

1 **Table 1:** Murinometric and feeding parameters of male Wistar healthy and diabetic rats  
2 treated with green tea infusion

|                          | Ctrl          | Diabetes                 | GTI diabetic  |
|--------------------------|---------------|--------------------------|---------------|
| Naso-anal length (cm)    | 22.29 ± 1.25  | 15.60 ± 1.34*            | 16.00 ± 1.27  |
| Lee index (g/cm)         | 0.29 ± 0.01   | 0.29 ± 0.01              | 0.29 ± 0.03   |
| BMI (g/cm <sup>2</sup> ) | 0.55 ± 0.06   | 0.40 ± 0.06 <sup>#</sup> | 0.40 ± 0.09   |
| SRWG (g/Kg)              | 2.44 ± 0.25   | 0.15 ± 0.26*             | 0.23 ± 0.20   |
| CFE (g/g food)           | 0.185 ± 0.019 | 0.009 ± 0.018*           | 0.017 ± 0.015 |
| WGCC (g/Kcal food)       | 0.048 ± 0.005 | 0.002 ± 0.004*           | 0.004 ± 0.004 |

3 The data (Mean ± SD) were compared (Ctrl vs Diabetes; Diabetes vs GTI diabetic)  
4 considering statistical differences when  $P \leq 0.05$ . (n = 6 animals/group). Asterisk (\*)  
5 indicates difference between the Ctrl and Diabetes group ( $P < 0.0001$ ), and the hash (#)  
6 indicates different means from the same comparison ( $P = 0.0049$ ). BMI – body mass  
7 index; SRWG – specific rate of weight gain; CFE – coefficient of feeding efficiency;  
8 WGCC - weight gain per caloric consumption.

9  
10  
11  
12  
13  
14  
15  
16  
17  
18  
19  
20



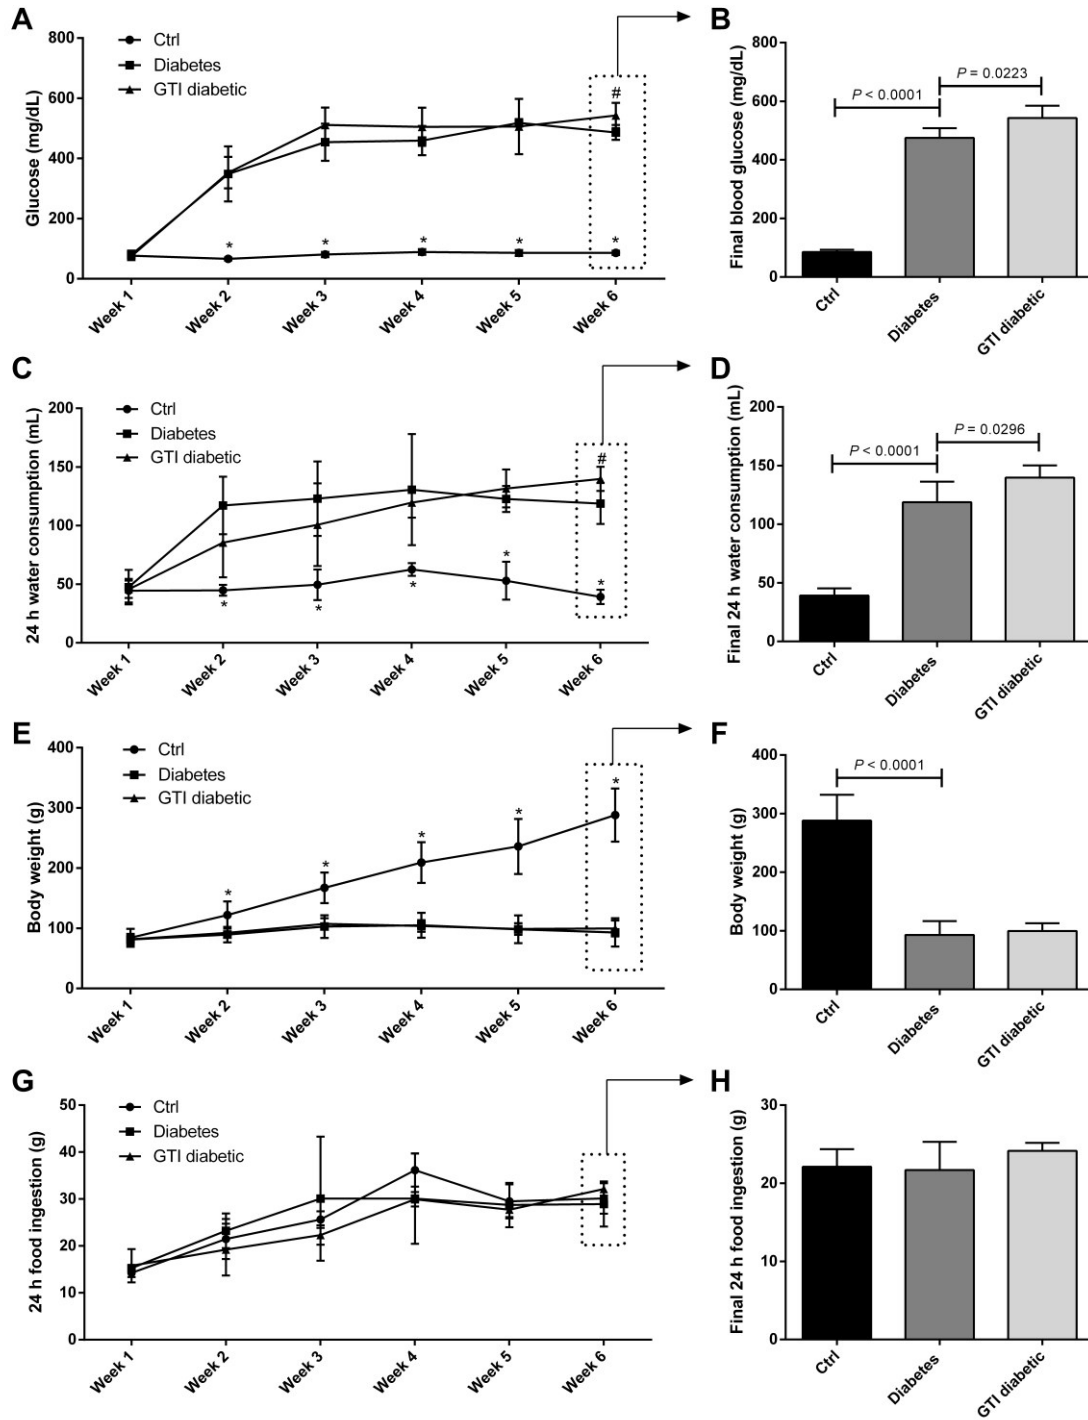

1

2

3

4

5

6

Figure 1

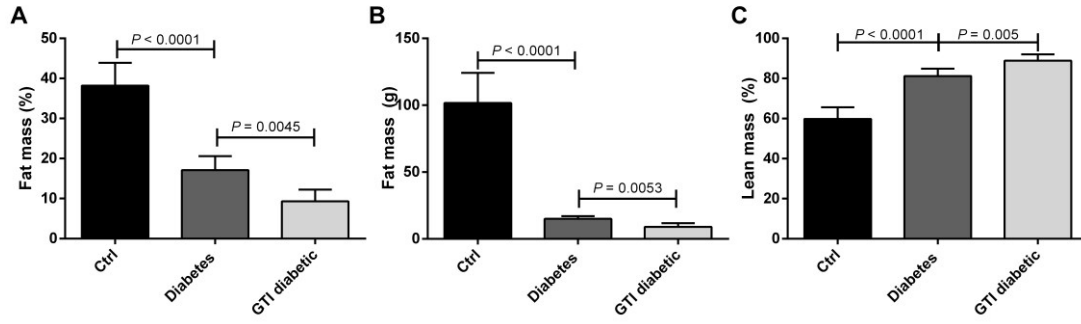

Figure 2

1  
2  
3  
4  
5  
6  
7  
8  
9  
10  
11  
12  
13  
14  
15  
16  
17  
18  
19  
20  
21

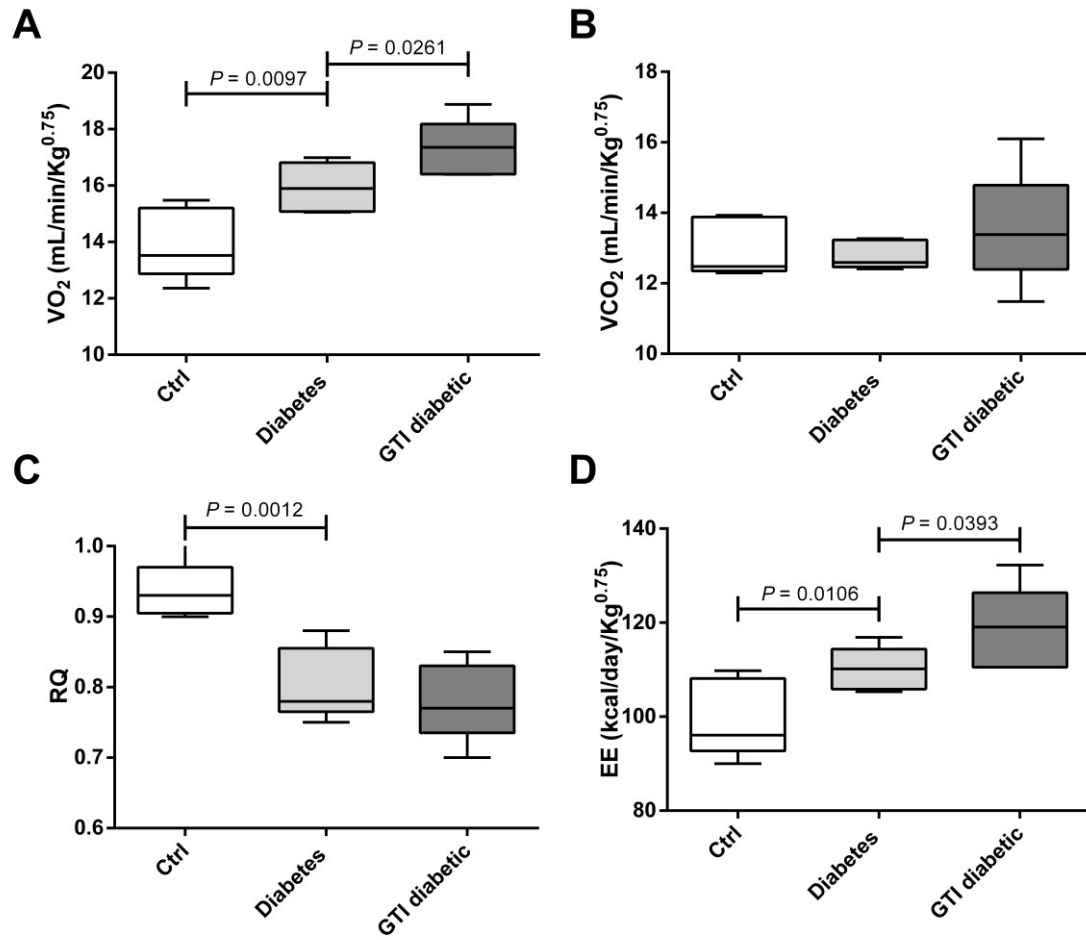

1

2

Figure 3
